# Supplementary material
Source: Springer Nature journal article supplement (https://www.springermedizin.de/resource/supplementary/12877_2013_996_MOESM1_ESM.pdf/9440884)
Supplement: MOESM1 [file 9440884]

| Timeline              | Nurse-Led Intervention                                                                                                                                                                                |     |   |   |   |   |   |   |   |
|-----------------------|-------------------------------------------------------------------------------------------------------------------------------------------------------------------------------------------------------|-----|---|---|---|---|---|---|---|
| Training              | (A)                                                                                                                                                                                                   | (B) |   |   |   |   |   |   |   |
| Recruitment           | C                                                                                                                                                                                                     |     |   |   |   |   |   |   |   |
| <b>Baseline (T1)</b>  | D                                                                                                                                                                                                     |     |   |   |   |   |   |   |   |
| Intervention          | E                                                                                                                                                                                                     |     |   |   |   |   |   |   |   |
| 2 weeks               | F                                                                                                                                                                                                     | G   | H | K | M |   |   |   |   |
| 1 month               | I                                                                                                                                                                                                     | O   |   |   |   |   |   |   |   |
| 2 months              | I                                                                                                                                                                                                     | F   | G | J | K | L | N | M | O |
| 3 months              | I                                                                                                                                                                                                     | F   | G | H | J | K | L | M | O |
| 4 months              | I                                                                                                                                                                                                     | F   | G | J | K | L | M | O |   |
| 5 months              | I                                                                                                                                                                                                     | F   | G | J | K | L | M | O |   |
| 6 months              | I                                                                                                                                                                                                     | F   | G | H | J | K | L | M | O |
|                       | P                                                                                                                                                                                                     |     |   |   |   |   |   |   |   |
| <b>6 months (T2)</b>  | Q                                                                                                                                                                                                     |     |   |   |   |   |   |   |   |
| <b>12 months (T3)</b> | R                                                                                                                                                                                                     |     |   |   |   |   |   |   |   |
| (A)                   | Training (3 days) of RNs in prevention, recognition and management of depression and problem-solving therapy                                                                                          |     |   |   |   |   |   |   |   |
| (B)                   | Training (3 days) of PSWs in prevention, recognition and management of depression and problem solving therapy                                                                                         |     |   |   |   |   |   |   |   |
| C                     | Recruitment of study participants by CCAC Case Manager                                                                                                                                                |     |   |   |   |   |   |   |   |
| D                     | Completion of informed consent by client and completion of baseline (T1) pre-test questionnaires via in-home interview by Research Assistant                                                          |     |   |   |   |   |   |   |   |
| E                     | Assignment of all eligible and consenting study participants to the Nurse-Led Intervention                                                                                                            |     |   |   |   |   |   |   |   |
| F                     | RN screens client for depressive symptoms using the GDS-15                                                                                                                                            |     |   |   |   |   |   |   |   |
| G                     | PSW screens client for depressive symptoms using the GIP-28                                                                                                                                           |     |   |   |   |   |   |   |   |
| H                     | RN screens for depression risk factors using standardized screening tools (CAM, SMMSE, SCREEN II, GAD-7)                                                                                              |     |   |   |   |   |   |   |   |
| I                     | RN conducts case conference with PSW to discuss assessment findings and develop plan of care                                                                                                          |     |   |   |   |   |   |   |   |
| J                     | RN identifies and addresses depression risk factors using depression risk management protocol                                                                                                         |     |   |   |   |   |   |   |   |
| K                     | RN assesses client's problem-solving abilities and provides problem-solving counselling                                                                                                               |     |   |   |   |   |   |   |   |
| L                     | RN and PSW provide social and behavioural activation                                                                                                                                                  |     |   |   |   |   |   |   |   |
| M                     | RN supports antidepressant medication management in collaboration with clients and their PCP using evidence-based guidelines                                                                          |     |   |   |   |   |   |   |   |
| N                     | RN provides client with a package of written information about depression and treatment options                                                                                                       |     |   |   |   |   |   |   |   |
| O                     | RN alerts the PCP to the presence of depressive symptoms, dementia, delirium or medication issues and identifies and initiates referrals to other health services and supports                        |     |   |   |   |   |   |   |   |
| P                     | Following completion of the 6-month intervention, the RN completes all documentation in the depression care booklet and the monthly visit and case conference records and sends it to the researchers |     |   |   |   |   |   |   |   |
| Q                     | Completion of 6-month (T2) post-test questionnaires via in-home interview by Research Assistant                                                                                                       |     |   |   |   |   |   |   |   |
| R                     | Completion of 12-month (T3) post-test questionnaires via in-home interview by Research Assistant                                                                                                      |     |   |   |   |   |   |   |   |
